# Supplementary material for: Recent advances in rational structure design for nonlinear optical crystals: leveraging advantageous templates
Source: Royal Society of Chemistry journal article supplement (doi:10.1039/d3cs01136d), 2024-01-01
Supplement: d3cs01136d1.pdf [file d3cs01136d1.pdf]

## Supporting Information

### Recent Advances in Rational Structure Design for Nonlinear Optical

### Crystals: Leveraging Advantageous Templates

Ziting Yan,<sup>ab</sup> Jinbin Fan,<sup>ab</sup> Shilie Pan<sup>\*ab</sup> and Min Zhang<sup>\*ab</sup>

<sup>a</sup>Research Center for Crystal Materials; State Key Laboratory of Functional Materials and Devices for Special Environmental Conditions; Xinjiang Key Laboratory of Functional Crystal Materials; Xinjiang Technical Institute of Physics and Chemistry, Chinese Academy of Sciences, 40-1 South Beijing Road, Urumqi 830011, China.

E-mail: slpan@ms.xjb.ac.cn, zhangmin@ms.xjb.ac.cn.

<sup>b</sup>Center of Materials Science and Optoelectronics Engineering, University of Chinese Academy of Sciences, Beijing 100049, China.

**TableS1.** Structures and optical properties of KBBF-type compounds.

|                                            | Compounds                                                                     | Space group   | SHG           | $\Delta n$                 | Absorption edge (nm) |
|--------------------------------------------|-------------------------------------------------------------------------------|---------------|---------------|----------------------------|----------------------|
| KBBF                                       | $\text{KBe}_2\text{BO}_3\text{F}_2$                                           | $R32$         | 1.25KDP       | 0.088@400nm                | 147                  |
|                                            | $\gamma\text{-KBe}_2\text{B}_3\text{O}_7$                                     | $P2_1$        | 0.68KDP       | /                          | 186 <sup>a</sup>     |
|                                            | $\beta\text{-KBe}_2\text{B}_3\text{O}_7$                                      | $Pmn2_1$      | 0.75KDP       | /                          | 187 <sup>a</sup>     |
|                                            | $\text{RbBe}_2\text{B}_3\text{O}_7$                                           | $Pmn2_1$      | 0.79KDP       | /                          | 179 <sup>a</sup>     |
| Beryllium borates with KBBF-like structure | $\text{Na}_2\text{CsBe}_6\text{B}_5\text{O}_{15}$                             | $C2$          | 1.17KDP       | /                          | 192 <sup>a</sup>     |
|                                            | $\text{Na}_2\text{Be}_4\text{B}_4\text{O}_{11}$                               | $P1$          | 1.3KDP        | 0.047@400nm                | 171                  |
|                                            | $\text{LiNa}_5\text{Be}_{12}\text{B}_{12}\text{O}_{33}$                       | $Pc$          | 1.4KDP        | 0.045@1064nm               | 169                  |
|                                            | $\text{BaBe}_2\text{BO}_3\text{F}_3$                                          | $P6_3$        | 0.1KDP        | 0.081@200nm                | <185                 |
|                                            | $\text{NH}_4\text{Be}_2\text{BO}_3\text{F}_2$                                 | $R32$         | 1.2KDP        | 0.057@400nm                | 153                  |
|                                            | $\gamma\text{-Be}_2\text{BO}_3\text{F}$                                       | $R32$         | 2.3KDP        | 0.0989@1064nm              | 144.8 <sup>a</sup>   |
|                                            | $\text{Be}_2\text{BO}_3\text{F}^*$                                            | $\bar{p}6_2c$ | 1.5KDP        | 0.086@400nm                | 138                  |
| Aluminum borates with KBBF-like structure  | $\text{BaAlBO}_3\text{F}_2$                                                   | $\bar{p}6_2c$ | 2.0KDP        | 0.0522@266nm               | 165                  |
|                                            | $\text{Rb}_3\text{Al}_3\text{B}_3\text{O}_{10}\text{F}$                       | $P31c$        | 1.2KDP        | /                          | <200                 |
|                                            | $\text{CsAlB}_3\text{O}_6\text{F}$                                            | $Pna2_1$      | 2.0KDP        | 0.091@1064nm <sup>a</sup>  | 166 <sup>a</sup>     |
|                                            | $\text{RbAlB}_3\text{O}_6\text{F}$                                            | $Pna2_1$      | 0.2KDP        | 0.0946@1064nm <sup>a</sup> | <200                 |
|                                            | $\text{Cs}_{0.5}\text{Rb}_{0.5}\text{AlB}_3\text{O}_6\text{F}$                | $\bar{p}6_2c$ | 2.0KDP        | /                          | <200                 |
| Zinc borates with KBBF-like structure      | $\text{BaZnBO}_3\text{F}$                                                     | $\bar{p}6$    | 2.8KDP        | /                          | 223                  |
|                                            | $\text{CsZn}_2\text{B}_3\text{O}_7$                                           | $Cmc21$       | 1.5KDP        | 0.056@1064 nm              | 218                  |
|                                            | $\text{AZn}_2\text{BO}_3\text{X}_2$ (A=NH <sub>4</sub> , Na, K, Rb, X=Cl, Br) | $R32$         | ~2.53-3.01KDP | /                          | 190-209              |
|                                            | $\text{CsZn}_2\text{BO}_3\text{F}_2$                                          | $R32$         | 3.2KDP        | /                          | 190                  |
|                                            | $\text{CsZn}_2\text{BO}_3\text{Cl}_2$                                         | $R32$         | 2.8KDP        | /                          | 190                  |
|                                            | $\text{CsZn}_2\text{BO}_3\text{FCl}$                                          | $R3$          | 3.5KDP        | /                          | 190                  |
| Other borates with KBBF-like structure     | $\text{Li}_4\text{Sr}(\text{BO}_3)_2$                                         | $Cc$          | 2.0KDP        | 0.056@532nm                | 186                  |
|                                            | $\text{Pb}_2\text{BO}_3\text{Cl}$                                             | $P321$        | 9.0KDP        | 0.12@1064nm                | <300                 |
|                                            | $\text{Pb}_2\text{BO}_3\text{Br}$                                             | $P321$        | 9.5KDP        | 0.055@1064nm <sup>a</sup>  | ~372                 |
|                                            | $\text{Pb}_2\text{BO}_3\text{I}$                                              | $P321$        | 10.0KDP       | 0.036@1064nm               | <330                 |
|                                            | $\text{K}_5\text{Mg}_2\text{La}_3(\text{BO}_3)_6$                             | $P31m$        | 3.1KDP        | /                          | <200                 |

<sup>a</sup> The data come from theoretical calculations. / = Not available. \*Theoretically designed structure by using the first principles calculation method.

**TableS2.** Structures and optical properties of SBBO-type compounds.

|                   | Compounds                                                                                        | Space group             | SHG     | $\Delta n$               | Absorption edge (nm) |
|-------------------|--------------------------------------------------------------------------------------------------|-------------------------|---------|--------------------------|----------------------|
| SBBO              | SrBeB <sub>2</sub> O <sub>4</sub>                                                                | $\bar{P}6_2c$           | 3.8KDP  | 0.062@589nm <sup>a</sup> | 155                  |
| Beryllium borates | NaCaBe <sub>2</sub> B <sub>2</sub> O <sub>6</sub> F                                              | <i>Cc</i>               | 0.4KDP  | 0.057@800nm              | 190 <sup>a</sup>     |
| Aluminum borates  | BaAl <sub>2</sub> B <sub>2</sub> O <sub>7</sub>                                                  | <i>R32</i>              | 1.7KDP  | 0.063@589.3nm            | 180                  |
|                   | K <sub>2</sub> Al <sub>2</sub> B <sub>2</sub> O <sub>7</sub>                                     | <i>P321</i>             | ~0.9KDP | 0.07@1064nm              | 180                  |
|                   | K <sub>3</sub> Ba <sub>3</sub> Li <sub>2</sub> Al <sub>4</sub> B <sub>6</sub> O <sub>20</sub> F  | $\bar{P}6_2c$           | 1.5KDP  | 0.063@532nm              | 190                  |
|                   | K <sub>3</sub> Sr <sub>3</sub> Li <sub>2</sub> Al <sub>4</sub> B <sub>6</sub> O <sub>20</sub> F  | <i>R32</i>              | 1.7KDP  | 0.062@532nm              | 190                  |
|                   | Rb <sub>3</sub> Ba <sub>3</sub> Li <sub>2</sub> Al <sub>4</sub> B <sub>6</sub> O <sub>20</sub> F | $\bar{P}6_2c$           | 1.5KDP  | 0.061@532nm              | ~198                 |
|                   | Cs <sub>2</sub> Al <sub>2</sub> (B <sub>3</sub> O <sub>6</sub> ) <sub>2</sub> O                  | <i>P6<sub>3</sub></i>   | <1KDP   | 0.136@177.3              | 180                  |
| Other borates     | Ba <sub>3</sub> Mg <sub>3</sub> (BO <sub>3</sub> ) <sub>3</sub> F <sub>3</sub>                   | <i>Pna2<sub>1</sub></i> | 1.8KDP  | 0.045@532nm              | 184                  |
|                   | Ba <sub>3</sub> Mg <sub>3</sub> (BO <sub>3</sub> ) <sub>3</sub> F <sub>3</sub>                   | $\bar{P}6_2m$           | 2.0KDP  | /                        | <190                 |
|                   | CaZn <sub>2</sub> (BO <sub>3</sub> ) <sub>2</sub>                                                | <i>Aba2</i>             | 3.8KDP  | 0.081@546nm              | <190                 |

<sup>a</sup> The data come from theoretical calculations. / = Not available.

**TableS3.** Structures and optical properties of ABF-type compounds.

|                                        | Compounds                                                            | Space group             | SHG    | $\Delta n$   | Absorption edge (nm) |
|----------------------------------------|----------------------------------------------------------------------|-------------------------|--------|--------------|----------------------|
| ABF                                    | NH <sub>4</sub> B <sub>4</sub> O <sub>6</sub> F                      | <i>Pna2<sub>1</sub></i> | 3.0KDP | 0.117@1064nm | 156                  |
| Alkali metal fluorooxoborate s         | CsB <sub>4</sub> O <sub>6</sub> F                                    | <i>Pna2<sub>1</sub></i> | 1.9KDP | 0.114@1064nm | 155                  |
|                                        | NaB <sub>4</sub> O <sub>6</sub> F                                    | <i>C2</i>               | 0.9KDP | 0.120@1064nm | <180                 |
|                                        | RbB <sub>4</sub> O <sub>6</sub> F                                    | <i>C2</i>               | 0.8KDP | 0.102@1064nm | <190                 |
|                                        | CsKB <sub>8</sub> O <sub>12</sub> F <sub>2</sub>                     | <i>P321</i>             | 1.9KDP | 0.105@1064nm | <190                 |
|                                        | CsRbB <sub>8</sub> O <sub>12</sub> F <sub>2</sub>                    | $\bar{P}6_2c$           | 1.1KDP | /            | <190                 |
|                                        | CsKB <sub>8</sub> O <sub>12</sub> F <sub>2</sub> ·CsI                | <i>R32</i>              | 0.6KDP | 0.08@1064 nm | 216                  |
|                                        | CsNH <sub>4</sub> B <sub>8</sub> O <sub>12</sub> F <sub>2</sub> ·CsI | <i>R32</i>              | /      | /            | /                    |
| Alkaline earth metal fluorooxoborate s | MgB <sub>5</sub> O <sub>7</sub> F <sub>3</sub>                       | <i>Cmc2<sub>1</sub></i> | 2.4KDP | 0.07@1064nm  | <200                 |
|                                        | CaB <sub>5</sub> O <sub>7</sub> F <sub>3</sub>                       | <i>Cmc2<sub>1</sub></i> | 2.0KDP | 0.07@1064nm  | <180                 |
|                                        | SrB <sub>5</sub> O <sub>7</sub> F <sub>3</sub>                       | <i>Cmc2<sub>1</sub></i> | 1.6KDP | 0.072@589nm  | <180                 |
|                                        | BaB <sub>2</sub> O <sub>3</sub> F <sub>2</sub>                       | <i>P2<sub>1</sub></i>   | /      | /            | <180                 |
| Other fluorooxoborate s                | PbB <sub>5</sub> O <sub>7</sub> F <sub>3</sub>                       | <i>Cmc2<sub>1</sub></i> | 6KDP   | 0.12@1064nm  | 225                  |
|                                        | PbB <sub>2</sub> O <sub>3</sub> F <sub>2</sub>                       | <i>P3<sub>1</sub>m</i>  | 13KDP  | /            | 220                  |
|                                        | SnB <sub>2</sub> O <sub>3</sub> F <sub>2</sub>                       | <i>P3<sub>1</sub>m</i>  | 4KDP   | /            | 250                  |

<sup>a</sup> The data come from theoretical calculations. / = Not available.

**TableS4.** Structures and optical properties of LBO-type compounds.

|                                                                  | Compounds                                                                                       | Space group                                                        | SHG                                                 | $\Delta n$    | Absorption edge (nm)      |
|------------------------------------------------------------------|-------------------------------------------------------------------------------------------------|--------------------------------------------------------------------|-----------------------------------------------------|---------------|---------------------------|
| LBO                                                              | LiB <sub>3</sub> O <sub>5</sub>                                                                 | <i>Pna</i> 2 <sub>1</sub>                                          | $d_{31}=-0.67$<br>$d_{32}=0.85$<br>$d_{33}=0.04$    | 0.041@1064nm  | 155                       |
| Fluorine-directed modification                                   | Li <sub>2</sub> B <sub>6</sub> O <sub>9</sub> F <sub>2</sub>                                    | <i>Cc</i>                                                          | 0.9KDP                                              | 0.07@1064nm   | < 190                     |
|                                                                  | LiB <sub>6</sub> O <sub>9</sub> F                                                               | <i>Pna</i> 2 <sub>1</sub>                                          | $d_{15}=0.055$<br>$d_{24}=0.161$<br>$d_{33}=-0.011$ | 0.06@1064nm   | Bandgap=6.57 <sup>a</sup> |
|                                                                  | Li <sub>2</sub> B <sub>3</sub> O <sub>4</sub> F <sub>3</sub>                                    | <i>P2</i> <sub>1</sub> <i>2</i> <sub>1</sub> <i>2</i> <sub>1</sub> | $d_{14}=0.088$                                      | 0.05@1064nm   | Bandgap=6.73 <sup>a</sup> |
|                                                                  | LiNaB <sub>6</sub> O <sub>9</sub> F <sub>2</sub>                                                | <i>Pnn</i> 2                                                       | 1.1KDP                                              | 0.067@1064nm  | <190                      |
|                                                                  | RbB <sub>3</sub> O <sub>4</sub> F <sub>2</sub>                                                  | <i>P2</i> <sub>1</sub> / <i>c</i> (CS)                             | /                                                   | 0.09@1064nm   | <190                      |
| Combining anion groups based on [B <sub>3</sub> O <sub>7</sub> ] | Cs <sub>3</sub> [(BOP) <sub>2</sub> (B <sub>3</sub> O <sub>7</sub> ) <sub>3</sub> ]             | <i>R3</i>                                                          | 3.0KDP                                              | 0.075@532nm   | 165                       |
|                                                                  | Rb <sub>3</sub> B <sub>11</sub> P <sub>2</sub> O <sub>23</sub>                                  | <i>P1</i>                                                          | 2.5KDP                                              | 0.071@1064nm  | 168                       |
| "Structure-analogue"                                             | BC <sub>2</sub> N <sub>5</sub> H <sub>6</sub> (OH) <sub>2</sub> ·H <sub>2</sub> O               | <i>P2</i> <sub>1</sub> <i>2</i> <sub>1</sub> <i>2</i> <sub>1</sub> | 0.5KDP                                              | 0.181@546.1nm | 240                       |
|                                                                  | B(C <sub>2</sub> N <sub>5</sub> H <sub>6.5</sub> ) <sub>2</sub> (NO <sub>3</sub> ) <sub>2</sub> | <i>C222</i>                                                        | 5.9KDP                                              | 0.148@546.1nm | 243                       |

<sup>a</sup> The data come from theoretical calculations. / = Not available.

**TableS5.** Structures and optical properties of  $\beta$ -BBO-type compounds.

|                                                                                                        | Compounds                                                                                                               | Space group                                                                                              | SHG            | $\Delta n$                | Absorption edge (nm) |
|--------------------------------------------------------------------------------------------------------|-------------------------------------------------------------------------------------------------------------------------|----------------------------------------------------------------------------------------------------------|----------------|---------------------------|----------------------|
| $\beta$ -BBO                                                                                           | $\beta$ -BaB <sub>2</sub> O <sub>4</sub>                                                                                | <i>R3c</i>                                                                                               | 5.8KDP         | 0.114@1079nm              | 189                  |
|                                                                                                        | Ca <sub>3</sub> (C <sub>3</sub> N <sub>3</sub> O <sub>3</sub> ) <sub>2</sub>                                            | <i>R3c</i>                                                                                               | $d_{22}=3.46$  | 0.372@589.3nm             | /                    |
|                                                                                                        | Ca <sub>3-x</sub> Sr <sub>x</sub> (C <sub>3</sub> N <sub>3</sub> O <sub>3</sub> ) <sub>2</sub>                          | <i>R3c</i>                                                                                               | >BBO           | /                         | /                    |
|                                                                                                        | $\alpha$ -Sr <sub>3</sub> (C <sub>3</sub> N <sub>3</sub> O <sub>3</sub> ) <sub>2</sub>                                  | <i>Cc</i>                                                                                                | >BBO           | /                         | /                    |
|                                                                                                        | $\beta$ -Sr <sub>3</sub> (C <sub>3</sub> N <sub>3</sub> O <sub>3</sub> ) <sub>2</sub>                                   | <i>R3c</i>                                                                                               | $d_{22}=3.93$  | 0.374@589.3nm             | 420                  |
|                                                                                                        | K <sub>6</sub> Cd <sub>3</sub> (C <sub>3</sub> N <sub>3</sub> O <sub>3</sub> ) <sub>4</sub>                             | $\bar{1}43d$                                                                                             | $d_{14}=1.17$  | /                         | 237                  |
|                                                                                                        | Eu <sub>3</sub> (C <sub>3</sub> N <sub>3</sub> O <sub>3</sub> ) <sub>2</sub>                                            | <i>R3c</i>                                                                                               | <BBO@80<br>0nm | /                         | /                    |
| Cyanurates                                                                                             | KLi(HC <sub>3</sub> N <sub>3</sub> O <sub>3</sub> ) $\cdot$ 2H <sub>2</sub> O                                           | <i>Pna2</i> <sub>1</sub>                                                                                 | 5.3KDP         | 0.186@514nm               | 237                  |
|                                                                                                        | RbLi(HC <sub>3</sub> N <sub>3</sub> O <sub>3</sub> ) $\cdot$ 2H <sub>2</sub> O                                          | <i>Pna2</i> <sub>1</sub>                                                                                 | 2.1KDP         | 0.18@514.6nm <sup>a</sup> | 239                  |
|                                                                                                        | RbNa(HC <sub>3</sub> N <sub>3</sub> O <sub>3</sub> ) $\cdot$ 2H <sub>2</sub> O                                          | <i>Pna2</i> <sub>1</sub>                                                                                 | 5.3KDP         | 0.194@532nm               | 247                  |
|                                                                                                        | Rb <sub>0.86</sub> Cs <sub>0.14</sub> Na(HC <sub>3</sub> N <sub>3</sub> O <sub>3</sub> ) $\cdot$ 2H <sub>2</sub> O      | <i>Pna2</i> <sub>1</sub>                                                                                 | 3KDP           | 0.238@532nm <sup>a</sup>  | 240                  |
|                                                                                                        | Sr(HC <sub>3</sub> N <sub>3</sub> O <sub>3</sub> ) $\cdot$ 2H <sub>2</sub> O                                            | <i>Ima2</i>                                                                                              | /              | /                         | /                    |
|                                                                                                        | Sr(HC <sub>3</sub> N <sub>3</sub> O <sub>3</sub> ) $\cdot$ 2.5H <sub>2</sub> O                                          | <i>Pnc2</i>                                                                                              | $d_{15}=5.00$  | 0.341@800nm <sup>a</sup>  | /                    |
|                                                                                                        | Cs <sub>3</sub> Na(H <sub>2</sub> C <sub>3</sub> N <sub>3</sub> O <sub>3</sub> ) <sub>4</sub> $\cdot$ 3H <sub>2</sub> O | <i>Pmn2</i> <sub>1</sub>                                                                                 | 0.67KDP        | 0.29@514nm <sup>a</sup>   | 227                  |
|                                                                                                        | Rb <sub>3</sub> Na(H <sub>2</sub> C <sub>3</sub> N <sub>3</sub> O <sub>3</sub> ) <sub>4</sub> $\cdot$ 3H <sub>2</sub> O | <i>Pmn2</i> <sub>1</sub>                                                                                 | 0.4KDP         | 0.389@532nm <sup>a</sup>  | 234                  |
|                                                                                                        | LiCl $\cdot$ (H <sub>3</sub> C <sub>3</sub> N <sub>3</sub> O <sub>3</sub> )                                             | <i>R3m</i>                                                                                               | $d_{22}=4.15$  | 0.28@800nm <sup>a</sup>   | 215                  |
|                                                                                                        | Barbiturates                                                                                                            | Li <sub>2</sub> (H <sub>2</sub> C <sub>4</sub> N <sub>2</sub> O <sub>3</sub> ) $\cdot$ 2H <sub>2</sub> O | <i>Fdd2</i>    | 10.8KDP                   | 0.218@546nm          |
| Ca(H <sub>3</sub> C <sub>4</sub> N <sub>2</sub> O <sub>3</sub> ) <sub>2</sub> $\cdot$ H <sub>2</sub> O |                                                                                                                         | <i>Aba2</i>                                                                                              | 1.15KDP        | 0.490@546.1nm             | 269                  |
| Melamine                                                                                               | 2(C <sub>3</sub> H <sub>7</sub> N <sub>6</sub> ) <sup>+</sup> 2Cl <sup>-</sup> $\cdot$ H <sub>2</sub> O                 | <i>Cmc2</i> <sub>1</sub>                                                                                 | 4.3KDP         | 0.277@546 nm <sup>a</sup> | 245                  |
| [C <sub>5</sub> H <sub>6</sub> ON] <sup>+</sup><br>cation                                              | [C <sub>5</sub> H <sub>6</sub> ON] <sup>+</sup> [H <sub>2</sub> PO <sub>4</sub> ] <sup>-</sup>                          | <i>P2</i> <sub>1</sub> 2 <sub>1</sub> 2 <sub>1</sub>                                                     | 3.0KDP         | 0.25@1064nm <sup>a</sup>  | 264                  |
| [C <sub>4</sub> H <sub>6</sub> N <sub>3</sub> ] <sup>+</sup><br>cation                                 | [C <sub>4</sub> H <sub>6</sub> N <sub>3</sub> ] <sup>+</sup> [H <sub>2</sub> PO <sub>3</sub> ] <sup>-</sup>             | <i>P2</i> <sub>1</sub>                                                                                   | 2.0KDP         | 0.225@589.3nm             | 346                  |
| Other organic<br>planar $\pi$ -<br>conjugated<br>groups                                                | [C(NH <sub>2</sub> ) <sub>3</sub> ] <sub>2</sub> [B <sub>3</sub> O <sub>3</sub> F <sub>4</sub> (OH)]                    | <i>P1</i>                                                                                                | 1.4KDP         | 0.161@1064nm              | 195                  |
|                                                                                                        | C(NH <sub>2</sub> ) <sub>3</sub> SO <sub>3</sub> F                                                                      | <i>R3m</i>                                                                                               | 5KDP           | 0.133@1064nm              | 200                  |
|                                                                                                        | C(NH <sub>2</sub> ) <sub>3</sub> BF <sub>4</sub>                                                                        | <i>R3m</i>                                                                                               | 4.03KDP        | 0.120@546nm               | 193                  |
|                                                                                                        | [C(NH <sub>2</sub> ) <sub>3</sub> ] <sub>6</sub> (PO <sub>4</sub> ) <sub>2</sub> $\cdot$ 3H <sub>2</sub> O              | <i>Cc</i>                                                                                                | 3.8KDP         | 0.078@1064nm              | 205                  |
|                                                                                                        | [C(NH <sub>2</sub> ) <sub>3</sub> ] <sub>3</sub> PO <sub>4</sub> $\cdot$ 2H <sub>2</sub> O                              | <i>Pna2</i> <sub>1</sub>                                                                                 | 1.5KDP         | 0.055@546.1nm             | 250                  |
|                                                                                                        | (NH <sub>4</sub> ) <sub>2</sub> C <sub>2</sub> O <sub>4</sub> $\cdot$ H <sub>2</sub> O                                  | <i>P2</i> <sub>1</sub> 2 <sub>1</sub> 2 <sub>1</sub>                                                     | 0.9KDP         | 0.1587@546nm              | /                    |
|                                                                                                        | (NH <sub>4</sub> )Sb <sub>2</sub> C <sub>2</sub> O <sub>4</sub> F <sub>5</sub>                                          | <i>P2</i> <sub>1</sub> 2 <sub>1</sub> 2 <sub>1</sub>                                                     | 1.1KDP         | 0.111@546nm               | 285                  |
|                                                                                                        | NaHC <sub>4</sub> O <sub>4</sub> $\cdot$ H <sub>2</sub> O                                                               | <i>Pc</i>                                                                                                | 2.3KDP         | 0.52@1064nm               | 350                  |

<sup>a</sup> The data come from theoretical calculations. / = Not available.

**TableS6.** Structures and optical properties of KTP-type compounds.

|            | Compounds                                                                                         | Space group                                                          | SHG                    | $\Delta n$   | Bandgap (eV) |
|------------|---------------------------------------------------------------------------------------------------|----------------------------------------------------------------------|------------------------|--------------|--------------|
| KTP        | KTiOPO <sub>4</sub>                                                                               | <i>Pna2</i> <sub>1</sub>                                             | ~8KDP                  | /            | 3.65         |
| Phosphates | NH <sub>4</sub> TiOPO <sub>4</sub>                                                                | <i>Pna2</i> <sub>1</sub>                                             | quartz: 2400           | /            | /            |
|            | TiTiOPO <sub>4</sub>                                                                              | <i>Pna2</i> <sub>1</sub>                                             | quartz: 6000           | /            | /            |
|            | AgTiOPO <sub>4</sub>                                                                              | <i>Pna2</i> <sub>1</sub>                                             | /                      | /            | /            |
|            | KAIFPO <sub>4</sub>                                                                               | <i>Pna2</i> <sub>1</sub>                                             | /                      | /            | /            |
|            | KGaFPO <sub>4</sub>                                                                               | <i>Pna2</i> <sub>1</sub>                                             | /                      | /            | /            |
|            | KGeOPO <sub>4</sub>                                                                               | <i>Pna2</i> <sub>1</sub>                                             | quartz: 3.3            | /            | /            |
|            | KVOPO <sub>4</sub>                                                                                | <i>Pna2</i> <sub>1</sub>                                             | /                      | /            | /            |
|            | KSnOPO <sub>4</sub>                                                                               | <i>Pna2</i> <sub>1</sub>                                             | quartz: 0.5            | /            | /            |
|            | KMg(H <sub>2</sub> O)PO <sub>4</sub>                                                              | <i>Pmn2</i> <sub>1</sub>                                             | ~1.14KDP               | 0.017@1064nm | >6.2         |
| Sulfates   | NH <sub>4</sub> SbSO <sub>4</sub> Cl <sub>2</sub>                                                 | <i>P2</i> <sub>1</sub> 2 <sub>1</sub> 2 <sub>1</sub>                 | ~1.7KDP                | /            | 4.54         |
|            | RbSbSO <sub>4</sub> Cl <sub>2</sub>                                                               | <i>P2</i> <sub>1</sub> 2 <sub>1</sub> 2 <sub>1</sub>                 | 2.7KDP                 | /            | 3.48         |
|            | CsSbSO <sub>4</sub> F <sub>2</sub>                                                                | <i>Pna2</i> <sub>1</sub>                                             | 3.0KDP                 | 0.112@1064nm | 4.76         |
|            | RbSbSO <sub>4</sub> F <sub>2</sub>                                                                | <i>Pna2</i> <sub>1</sub>                                             | 0.96KDP                | /            | 4.75         |
|            | NH <sub>4</sub> SbSO <sub>4</sub> F <sub>2</sub>                                                  | <i>Pna2</i> <sub>1</sub>                                             | 0.7KDP                 | 0.138@1064nm | 4.67         |
|            | NH <sub>4</sub> BiSO <sub>4</sub> Cl <sub>2</sub>                                                 | <i>P2</i> <sub>1</sub> 2 <sub>1</sub> 2 <sub>1</sub>                 | 4.8KDP                 | 0.055@1064nm | <4.0         |
|            | RbBiSO <sub>4</sub> Cl <sub>2</sub>                                                               | <i>P2</i> <sub>1</sub> 2 <sub>1</sub> 2 <sub>1</sub>                 | 5.5KDP                 | 0.056@1064nm | <4.0         |
|            | KBiSO <sub>4</sub> Cl <sub>2</sub>                                                                | <i>P2</i> <sub>1</sub> 2 <sub>1</sub> 2 <sub>1</sub>                 | 5.3KDP                 | 0.047@1064nm | <4.0         |
|            | K <sub>2</sub> Mn <sub>3</sub> (SO <sub>4</sub> ) <sub>3</sub> F <sub>2</sub> ·4H <sub>2</sub> O  | <i>Cmc2</i> <sub>1</sub>                                             | 0.2KDP                 | /            | 5.54         |
|            | Rb <sub>2</sub> Mn <sub>3</sub> (SO <sub>4</sub> ) <sub>3</sub> F <sub>2</sub> ·2H <sub>2</sub> O | <i>Cmc2</i> <sub>1</sub>                                             | 0.25KDP                | /            | 5.55         |
|            | KMgSO <sub>4</sub> F                                                                              | <i>Pna2</i> <sub>1</sub>                                             | <1KDP                  | /            | >6.52        |
|            | KZnSO <sub>4</sub> F                                                                              | <i>Pna2</i> <sub>1</sub>                                             | <1KDP                  | /            | >6.52        |
|            | Other KTP-type crystals                                                                           | Pb <sub>2</sub> GaF <sub>2</sub> (SeO <sub>3</sub> ) <sub>2</sub> Cl | <i>P2</i> <sub>1</sub> | 4.5KDP       | /            |
|            | ZrOF <sub>4</sub> H <sub>2</sub>                                                                  | <i><math>\bar{1}</math>A2d</i>                                       | 2.2KDP                 | 0.035@546nm  | >6.52        |
|            | HfOF <sub>4</sub> H <sub>2</sub>                                                                  | <i><math>\bar{1}</math>A2d</i>                                       | 1.8KDP                 | 0.026@546nm  | >6.52        |

/ = Not available.

**TableS7.** Structures and optical properties of Perovskite framework-type and Aurivillius-type compounds.

|                                 | Compounds                                        | Space group        | SHG                                                                                                                                            | $\Delta n$     | Absorption edge (nm) |
|---------------------------------|--------------------------------------------------|--------------------|------------------------------------------------------------------------------------------------------------------------------------------------|----------------|----------------------|
| Perovskite framework-type       | $K_3B_6O_{10}Br$                                 | <i>R3m</i>         | 3.0KDP                                                                                                                                         | 0.048@589.3 nm | 182                  |
|                                 | $K_3B_6O_{10}Cl$                                 | <i>R3m</i>         | 4.0KDP                                                                                                                                         | /              | 180                  |
|                                 | $K_{3-x}Na_xB_6O_{10}Br$<br>( $x = 0.13, 0.67$ ) | <i>R3m</i>         | ~2.8KDP                                                                                                                                        | /              | <190                 |
|                                 | $K_{3-x}Na_xB_6O_{10}Br$<br>( $x = 1.30, 2.20$ ) | <i>Pnma</i> (CS)   | /                                                                                                                                              | /              | <190                 |
|                                 | $Na_3B_6O_{10}Br$                                | <i>Pnma</i> (CS)   | /                                                                                                                                              | /              | 290                  |
|                                 | $Na_3B_6O_{10}Cl$                                | <i>P2_12_12_1</i>  | $d_{14} = -0.06^a$                                                                                                                             | /              | <190                 |
|                                 | $RbNa_2B_6O_{10}Cl$                              | <i>P2_12_12_1</i>  | $d_{14} = 0.03^a$                                                                                                                              | /              | <190                 |
|                                 | $RbNa_2B_6O_{10}Br$                              | <i>Pnma</i> (CS)   | /                                                                                                                                              | /              | <190                 |
|                                 | $Rb_3B_6O_{10}Cl^*$                              | <i>P2_12_12_1</i>  | 2.2KDP                                                                                                                                         | 0.047@532 nm   | 6.56                 |
|                                 | Aurivillius-type                                 | $BaClBF_4$         | <i>Pmn2_1</i>                                                                                                                                  | 0.2KDP         | /                    |
| $\alpha$ -BaBOF <sub>3</sub>    |                                                  | <i>P2_1</i>        | $d_{16} = 0.21,$<br>$d_{14} = 0.05,$<br>$d_{22} = -0.33,$<br>$d_{23} = 0.24^a$                                                                 | /              | <200                 |
| BaBOF <sub>3</sub> <sup>*</sup> |                                                  | <i>Cc</i>          | $d_{11} = -0.19,$<br>$d_{12} = -0.10,$<br>$d_{13} = 0.003,$<br>$d_{15} = 0.03,$<br>$d_{24} = 0.07,$<br>$d_{22} = -0.18,$<br>$d_{24} = -0.04^a$ | /              | <200                 |
| $\beta$ -BaBOF <sub>3</sub>     |                                                  | <i>P2_1/c</i> (CS) | /                                                                                                                                              | /              | <200                 |
| $\gamma$ -BaBOF <sub>3</sub>    |                                                  | <i>P2_1/c</i> (CS) | /                                                                                                                                              | /              | <200                 |

<sup>a</sup> The data come from theoretical calculations. / = Not available. \*Theoretically designed structure by using the first principles calculation method.

**TableS8.** Structures and optical properties of Diamond Like-type compounds.

|                                            | Compounds                                        | Space group   | SHG                      | $\Delta n(1064\text{nm})$ | Bandgap (eV)      |
|--------------------------------------------|--------------------------------------------------|---------------|--------------------------|---------------------------|-------------------|
| AGS                                        | AgGaS <sub>2</sub>                               | $\bar{I}42d$  | $d_{36} = 13.40$         | 0.039                     | 2.73              |
|                                            | $\alpha$ -ZnS                                    | $F\bar{4}3m$  | $d_{36} = 15.29$         | 0                         | 3.60              |
|                                            | $\beta$ -ZnS                                     | $P6_3mc$      | $d_{33} = -12.35$        | 0.004                     | 3.49              |
|                                            | GeS <sub>2</sub>                                 | $\bar{I}42d$  | $d_{36} = 12.52^a$       | 0.050 <sup>a</sup>        | 3.85 <sup>a</sup> |
|                                            | Ga <sub>2</sub> S <sub>3</sub>                   | $Cc$          | $d_{13} = 15.46^a$       | 0.041 <sup>a</sup>        | 2.80              |
|                                            | AgAlS <sub>2</sub>                               | $\bar{I}42d$  | $d_{36} = 4.88^a$        | 0.047 <sup>a</sup>        | 3.20              |
|                                            | AgGaS <sub>2</sub>                               | $\bar{I}42d$  | $d_{36} = 13.40$         | 0.053                     | 2.73              |
|                                            | LiAlS <sub>2</sub>                               | $Pna2_1$      | $d_{33} = 13.37^a$       | 0.014 <sup>a</sup>        | 4.68              |
| Binary and ternary diamond like structures | LiGaS <sub>2</sub>                               | $Pna2_1$      | $d_{33} = 10.70$         | 0.040                     | 4.15 <sup>a</sup> |
|                                            | Cu <sub>3</sub> SbS <sub>4</sub>                 | $\bar{I}42d$  | $d_{36} = -66.06^a$      | 0.072 <sup>a</sup>        | 0.88              |
|                                            | Cu <sub>3</sub> AsS <sub>4</sub>                 | $Pmn2_1$      | $d_{33} = -80.01^a$      | 0.230 <sup>a</sup>        | 1.34              |
|                                            | Li <sub>3</sub> PS <sub>4</sub>                  | $Pmn2_1$      | $d_{33} = 4.32^a$        | 0.016 <sup>a</sup>        | 3.68 <sup>a</sup> |
|                                            | Cu <sub>3</sub> PS <sub>4</sub>                  | $Pmn2_1$      | $d_{33} = -6.79^a$       | 0.048 <sup>a</sup>        | 2.51              |
|                                            | Ag <sub>3</sub> PS <sub>4</sub>                  | $Pmn2_1$      | $d_{33} = -7.58^a$       | 0.039 <sup>a</sup>        | 2.88 <sup>a</sup> |
|                                            | HgGa <sub>2</sub> S <sub>4</sub>                 | $\bar{I}4$    | $d_{36} = 31.5$          | 0.054                     | 2.84              |
|                                            | CdGa <sub>2</sub> S <sub>4</sub>                 | $\bar{I}4$    | $d_{36} = 15.83^a$       | 0.042 <sup>a</sup>        | 3.44              |
|                                            | ZnGa <sub>2</sub> S <sub>4</sub>                 | $\bar{I}4$    | $d_{36} = 11.92^a$       | 0.029 <sup>a</sup>        | 3.60              |
|                                            | Zn <sub>3</sub> (PS <sub>4</sub> ) <sub>2</sub>  | $P\bar{4}n2$  | $d_{\text{pow}} = 15.92$ | 0.035 <sup>a</sup>        | 3.07              |
|                                            | InPS <sub>4</sub>                                | $\bar{I}4$    | $d_{36} = 25$            | 0.048                     | 3.12              |
|                                            | LiZnPS <sub>4</sub>                              | $\bar{I}4$    | $d_{\text{pow}} = 11.70$ | 0.072 <sup>a</sup>        | 3.44              |
|                                            | AgZnPS <sub>4</sub>                              | $Pna2_1$      | $d_{\text{pow}} = 23.40$ | 0.051 <sup>a</sup>        | 2.76              |
|                                            | AgCd <sub>2</sub> GaS <sub>4</sub>               | $Pmn2_1$      | $d_{33} = -26.98^a$      | 0.059 <sup>a</sup>        | 2.15              |
|                                            | CuZn <sub>2</sub> AlS <sub>4</sub>               | $\bar{I}4_2m$ | $d_{36} = 7.94^a$        | 0.006 <sup>a</sup>        | 1.69              |
|                                            | Ag <sub>4</sub> CdGe <sub>2</sub> S <sub>7</sub> | $Cc$          | $d_{36} = 14.51$         | /                         | 2.45              |
|                                            | Ag <sub>4</sub> HgGe <sub>2</sub> S <sub>7</sub> | $Cc$          | $d_{36} = 23.07$         | /                         | 2.17              |
|                                            | Li <sub>4</sub> HgGe <sub>2</sub> S <sub>7</sub> | $Cc$          | 1.5AGS                   | /                         | 3.11              |
|                                            | Cu <sub>2</sub> CdSnS <sub>4</sub>               | $\bar{I}4_2m$ | $d_{36} = -25.42^a$      | 0.134 <sup>a</sup>        | 0.92              |
|                                            | Cu <sub>2</sub> HgGeS <sub>4</sub>               | $\bar{I}4_2m$ | $d_{36} = 44.23^a$       | 0.024 <sup>a</sup>        | 1.12 <sup>a</sup> |
| Quaternary diamond like structures         | Cu <sub>2</sub> ZnSnS <sub>4</sub>               | $\bar{I}4$    | $d_{36} = 32.62^a$       | 0.141 <sup>a</sup>        | 1.50              |
|                                            | Li <sub>2</sub> CdGeS <sub>4</sub>               | $Pmn2_1$      | $d_{33} = 11.92^a$       | 0.023 <sup>a</sup>        | 3.10              |
|                                            | Li <sub>2</sub> CdSnS <sub>4</sub>               | $Pmn2_1$      | $d_{33} = 8.74^a$        | 0.018 <sup>a</sup>        | 3.26              |
|                                            | $\alpha$ -Cu <sub>2</sub> ZnSiS <sub>4</sub>     | $Pmn2_1$      | $d_{33} = -10.06^a$      | 0.052 <sup>a</sup>        | 3.00              |
|                                            | Li <sub>2</sub> HgSiS <sub>4</sub>               | $Pmn2_1$      | 0.8AGS                   | /                         | 2.68              |
|                                            | Li <sub>2</sub> HgGeS <sub>4</sub>               | $Pmn2_1$      | 3.0AGS                   | /                         | 2.46              |
|                                            | Li <sub>2</sub> HgSnS <sub>4</sub>               | $Pmn2_1$      | 4.0AGS                   | /                         | 2.32              |
|                                            | Li <sub>2</sub> CdSiS <sub>4</sub>               | $Pmn2_1$      | 1.0AGS                   | /                         | 3.76              |
|                                            | Li <sub>2</sub> MnGeS <sub>4</sub>               | $Pna2_1$      | $d_{33} = 9.92^a$        | 0.010 <sup>a</sup>        | 3.07              |
|                                            | $\alpha$ -Li <sub>2</sub> MnSnS <sub>4</sub>     | $Pna2_1$      | $d_{33} = 6.25^a$        | 0.011 <sup>a</sup>        | 3.00              |
|                                            | Li <sub>2</sub> ZnSiS <sub>4</sub>               | $Pna2_1$      | 1.1AGS                   | /                         | 3.90              |
|                                            | $\alpha$ -Li <sub>2</sub> ZnGeS <sub>4</sub>     | $Pna2_1$      | 2.0AGS                   | /                         | 4.07              |

|                                          |                                       |               |                   |                    |                   |
|------------------------------------------|---------------------------------------|---------------|-------------------|--------------------|-------------------|
|                                          | $\text{Li}_2\text{ZnSnS}_4$           | <i>Pn</i>     | $d_{11}=12.84^a$  | 0.015 <sup>a</sup> | 2.87              |
|                                          | $\text{Ag}_2\text{ZnSiS}_4$           | <i>Pn</i>     | $d_{11}=11.60^a$  | 0.034 <sup>a</sup> | 3.28              |
|                                          | $\beta\text{-Cu}_2\text{ZnSiS}_4$     | <i>Pn</i>     | $d_{11}=12.02^a$  | 0.035 <sup>a</sup> | 3.20              |
|                                          | $\beta\text{-Li}_2\text{MnSnS}_4$     | <i>Pn</i>     | /                 | /                  | 2.60 <sup>a</sup> |
|                                          | $\beta\text{-Li}_2\text{ZnGeS}_4$     | <i>Pn</i>     | 0.7AGS            | /                  | 3.49              |
| Diamond like-<br>type metal<br>selenides | $\text{Li}_2\text{ZnGeSe}_4$          | <i>Pn</i>     | $\chi^{(2)}=19$   | /                  | 1.86              |
|                                          | $\text{Li}_2\text{ZnSnSe}_4$          | <i>Pn</i>     | $\chi^{(2)}=23$   | /                  | 1.87              |
|                                          | $\text{Li}_2\text{MnSnSe}_4$          | <i>Pmn2_1</i> | 0.5AGS            | /                  | 2.03              |
|                                          | $\text{Li}_2\text{CdGeSe}_4$          | <i>Pna2_1</i> | $\chi^{(2)}=25.6$ | /                  | 2.50              |
|                                          | $\text{Li}_2\text{CdSnSe}_4$          | <i>Pna2_1</i> | $\chi^{(2)}=25.3$ | /                  | 2.20              |
|                                          | $\text{RbGaSn}_2\text{Se}_6$          | <i>R3</i>     | 4.2AGS            | 0.051@2050 nm      | 1.80              |
|                                          | $\text{RbInSn}_2\text{Se}_6$          | <i>R3</i>     | 4.8AGS            | 0.067@2050 nm      | 1.92              |
|                                          | $\text{Li}_4\text{HgSn}_2\text{Se}_7$ | <i>Cc</i>     | 3.6AGS            | /                  | 2.10              |

<sup>a</sup> The data come from theoretical calculations. / = Not available.
